# Supplementary material
Source: HighWire-hosted journal article supplement (https://erj.ersjournals.com/content/55/1/1901847)
Supplement: inline-supplementary-material-1 [file inline-supplementary-material-1.pdf]

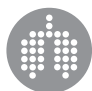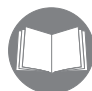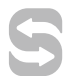

SHAREABLE PDF

# Respiratory medicine is not gender blind

Mina Gaga <sup>1</sup>, Daiana Stolz<sup>2</sup>, Joanna Chorostowska-Wynimko <sup>3</sup>, Tobias Welte<sup>4</sup> and Anita Simonds<sup>5</sup>

**Affiliations:** <sup>1</sup>7th Respiratory Medicine Dept, Athens Chest Hospital Sotiria, Athens, Greece. <sup>2</sup>University Hospital Basel, Pulmonary Care Division, Basel, Switzerland. <sup>3</sup>Institute of Tuberculosis and Lung Diseases, Warsaw, Genetics and Clinical Immunology, Warsaw, Poland. <sup>4</sup>University of Hannover, Pulmonary Medicine, Hannover, Germany. <sup>5</sup>Royal Brompton and Harefield NHS Foundation Trust, NIHR Respiratory Biomedical Research Unit, London, UK.

**Correspondence:** Mina Gaga, Athens Chest Hospital Sotiria, 7th Respiratory Medicine Dept, 152 Mesogion Ave, Athens, 15452, Greece. E-mail: minagaga@yahoo.com

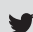

@ERSpublications

**Few women are still promoted to leadership positions and there seems to be an unconscious bias that must be changed** <http://bit.ly/2mET3t6>

**Cite this article as:** Gaga M, Stolz D, Chorostowska-Wynimko J, *et al.* Respiratory medicine is not gender blind. *Eur Respir J* 2020; 55: 1901847 [<https://doi.org/10.1183/13993003.01847-2019>].

This single-page version can be shared freely online.

Marie Curie is a legendary figure: her research had huge impact on medicine, and she was the first woman to receive a Nobel Prize. In fact, she received two, one in Physics in 1903, and one in Chemistry in 1911, and so early in the history of Nobel Prizes (they were first awarded in 1901) a woman was a laureate. This was before women's suffrage in most parts of the world, and before any notion of gender equality, when few women had a chance to follow a career in science or medicine or get any education, and Marie Curie showed that it was possible. She was admired, respected and a role model for women in science. But still, more than 100 years later, few women have followed her footsteps: Between 1901 and 2018, there have been 902 Nobel laureates and of those, 52 were women [1]. In Medicine, 109 Nobel Prizes have been awarded, to 216 laureates. Of them only 12 were women. It seems that there is something holding women back from excelling. Importantly though, six of those women were laureates in the last 15 years. So hopefully the trend is changing.
